# Supplementary material for: Anti-hepatoma activity of the stiff branched β-d-glucan and effects of molecular weight
Source: Royal Society of Chemistry journal article supplement (doi:10.1039/c6tb01299j), 2016-01-01
Supplement: c6tb01299j1.pdf [file c6tb01299j1.pdf]

## Supporting Information

### Anti-hepatoma activity of the stiff branched $\beta$ -D-glucan and effects of molecular weight

Zhaohua Ping,<sup>a</sup> Hui Xu,<sup>a</sup> Ting Liu,<sup>b</sup> Junchao Huang,<sup>a</sup> Yan Meng,<sup>a</sup> Xiaojuan Xu,<sup>a\*</sup> Wenhua Li<sup>b\*</sup> and Lina Zhang<sup>a\*</sup>

<sup>a</sup>*College of Chemistry and Molecular Sciences, Wuhan University, Wuhan 430072, China*

<sup>b</sup>*College of Life Sciences, Wuhan University, Wuhan 430072, China*

\*Correspondence to: L. Zhang ([zhangln@whu.edu.cn](mailto:zhangln@whu.edu.cn)), X. Xu ([xuxj@whu.edu.cn](mailto:xuxj@whu.edu.cn)) and W. Li ([whli@whu.edu.cn](mailto:whli@whu.edu.cn))

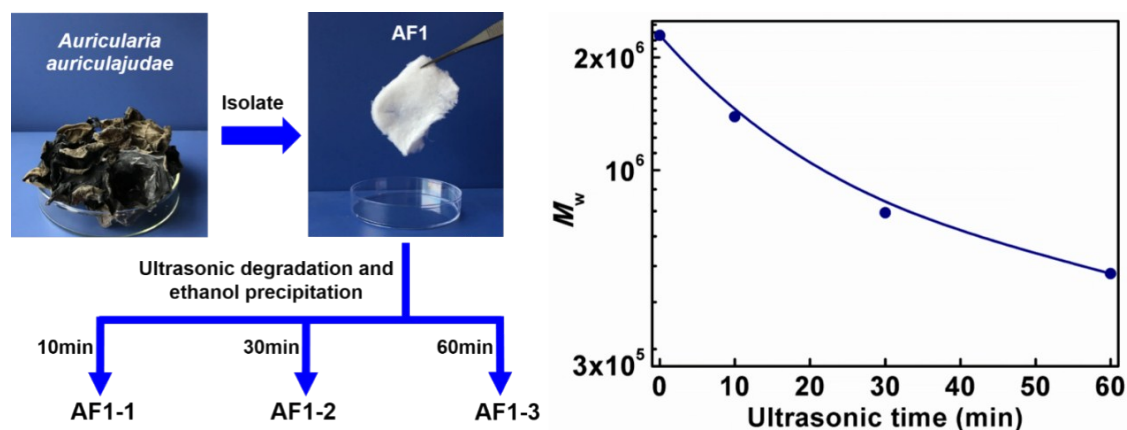

**Fig. S1** The fractionation process of polysaccharides AF1 from the *Auricularia auriculajudae* (left) and the ultrasonic time dependence of  $M_w$  for the AF1 fractions in water at 25 °C (right).

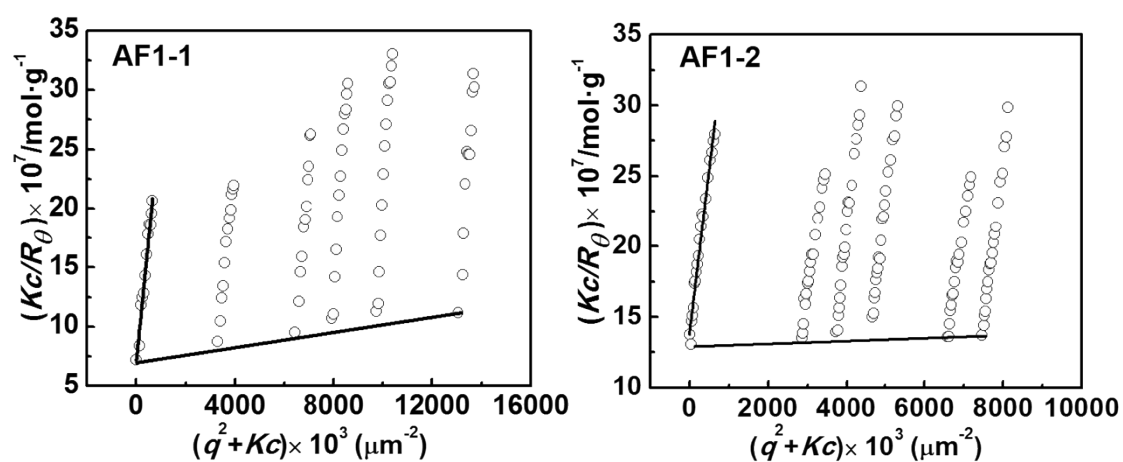

**Fig. S2** Zimm plots of AF1-1, AF1-2 solution in water at 25 °C.

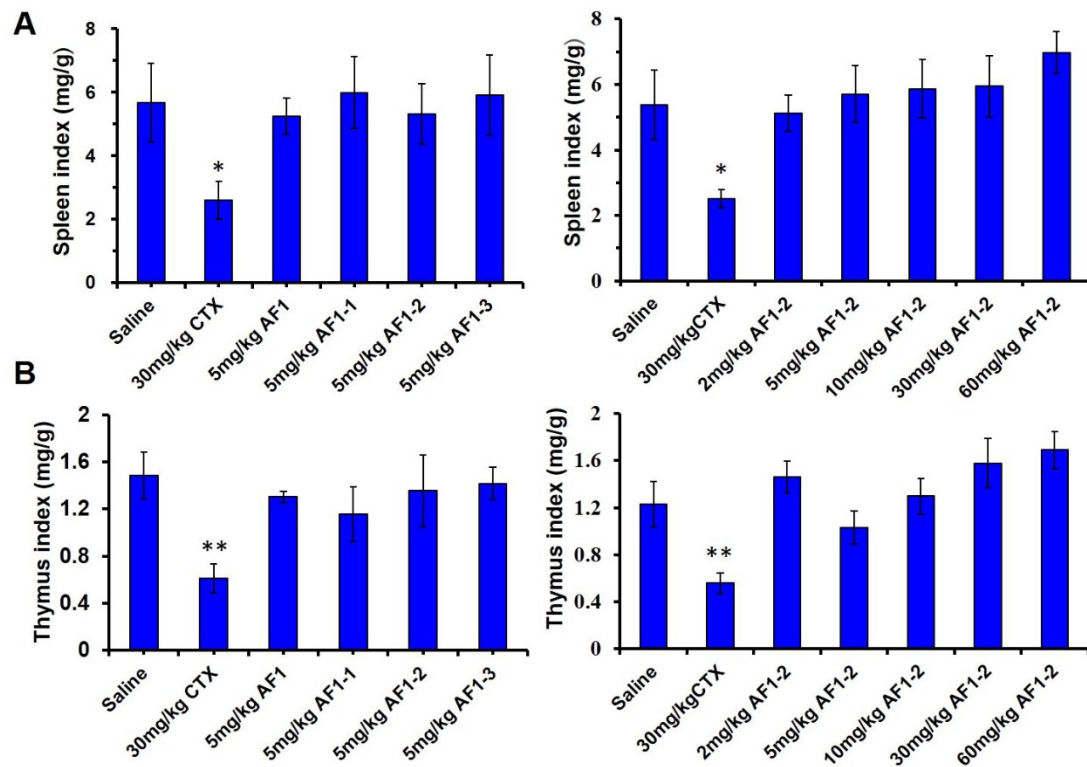

**Fig. S3** Anti-hepatoma activity of the AF1, AF1-1, AF1-2 and AF1-3 samples in vivo. (A) Spleen index (mg/g) of different group,  $*p < 0.05$  when compared with control. (B) Thymus index (mg/g) of different group,  $*p < 0.05$  when compared with control. Indicated values were mean  $\pm$  SD (n = 6).

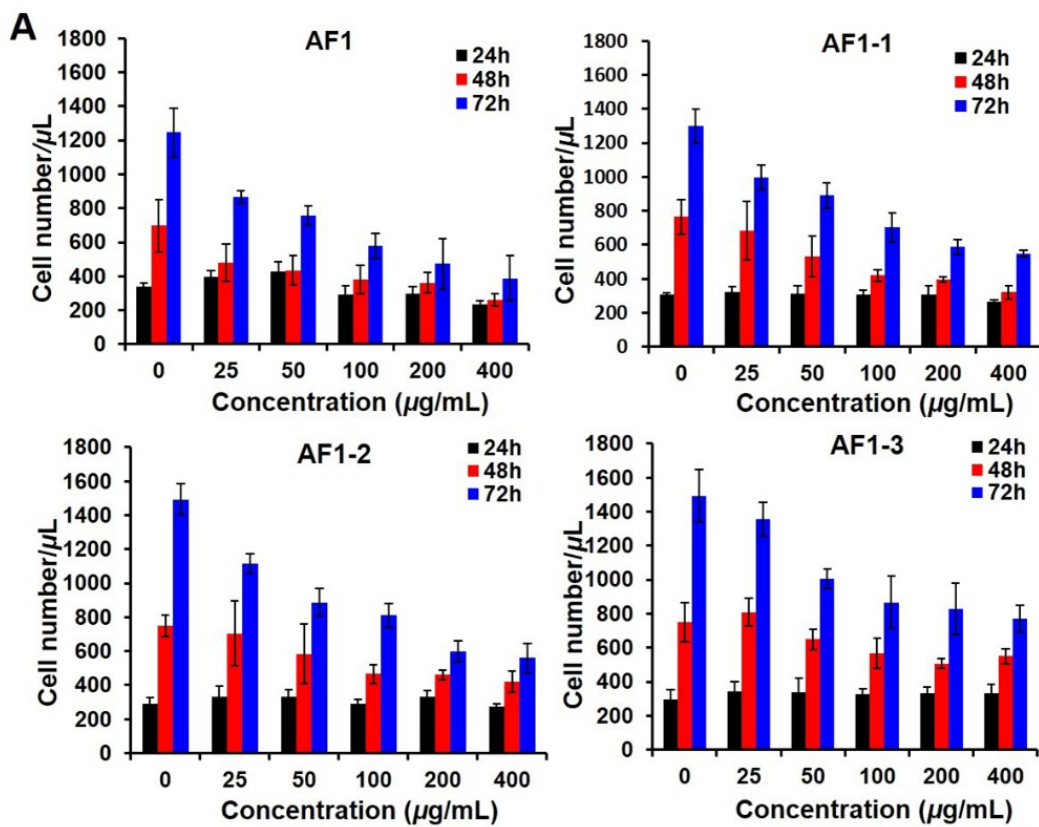

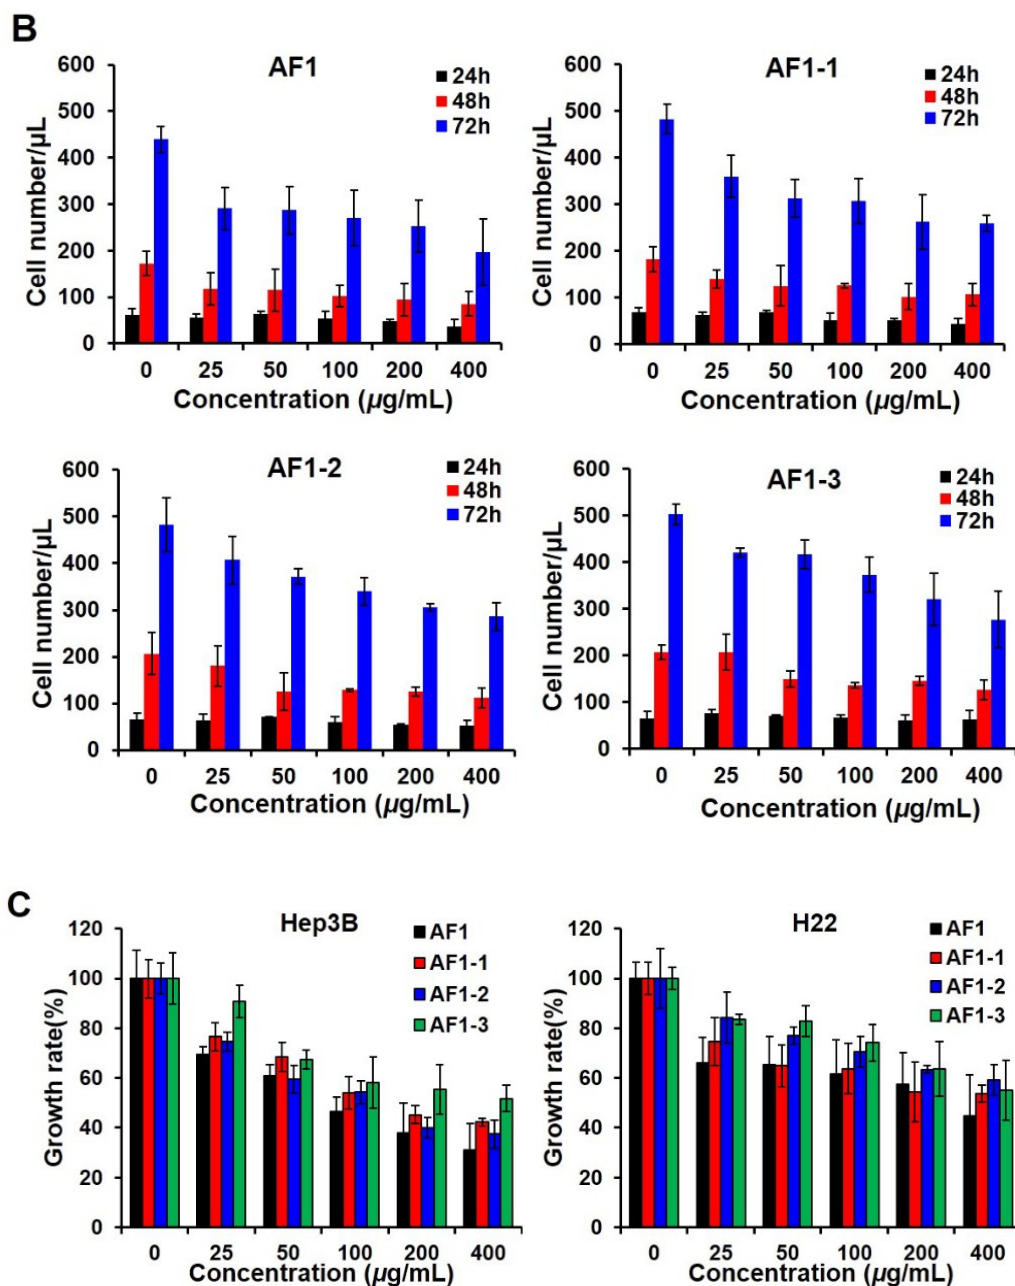

**Fig. S4** Cell proliferation inhibition effects of the AF1, AF1-1, AF1-2 and AF1-3 samples on liver cancer cells. Liver cancer cell lines Hep3B (A), H22 (B) were treated with indicated concentrations of the AF1, AF1-1, AF1-2 and AF1-3 samples for 24, 48 and 72 hours. (C) The growth ratio of Hep3B, H22 were treated with indicated concentrations of the AF1, AF1-1, AF1-2 and AF1-3 samples for 72 hours. Cell proliferation was measured by counting the total number of cells. The data represent the average of at least three independent experiments  $\pm$  SD.

**A**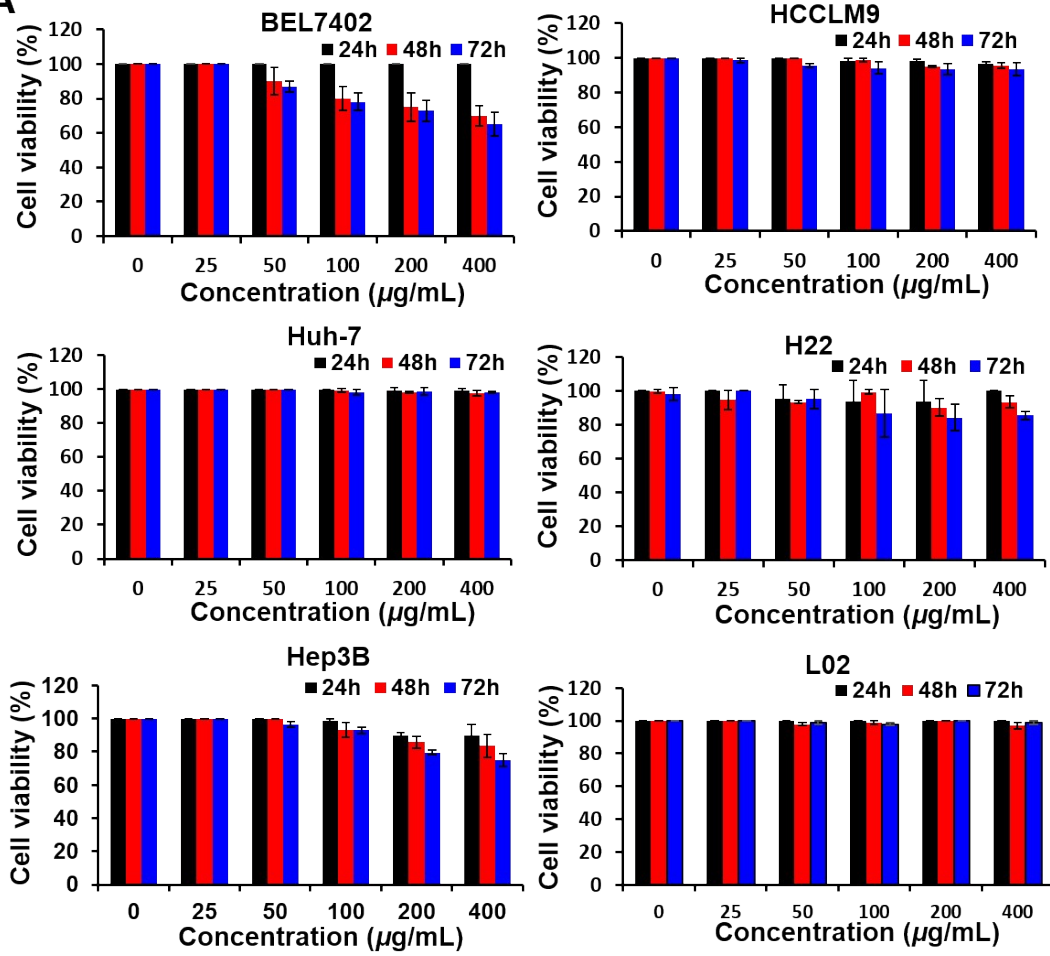

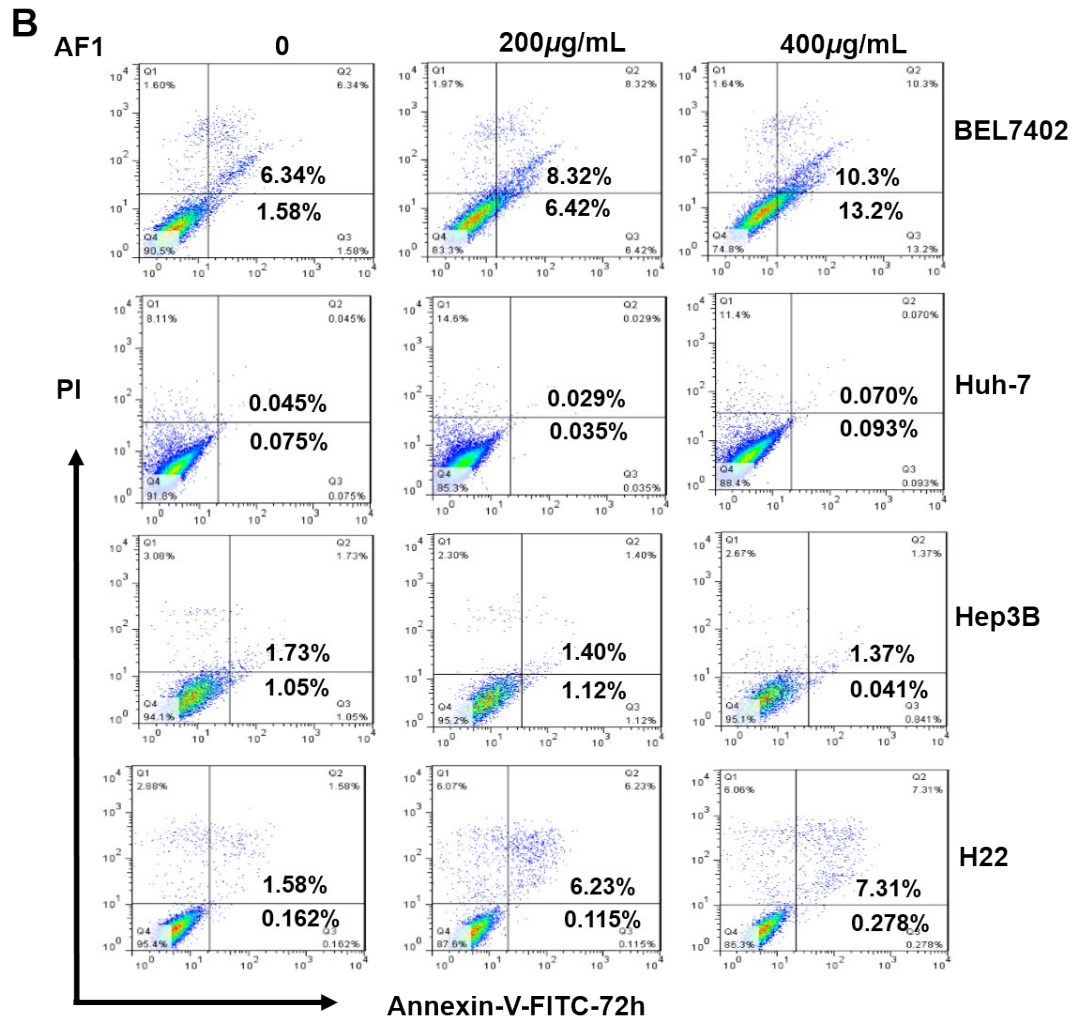

**Fig. S5** Cell proliferation and viability effects of AF1 on liver cancer cells. (A) Cell viability was determined by trypan blue exclusion assays. (B) BEL7402, Huh7, Hep3B, H22 were treated with 0, 200  $\mu$ g/mL, 400  $\mu$ g/mL concentrations of AF1 for 72 hours. Apoptosis was determined by annexin V-FITC/PI staining. The data represent the average of at least three independent experiments  $\pm$  SD.
